# 1 Specific morphology of coronary artery aneurysms in mainly 2 Caucasian Kawasaki Disease patients - Initial data from the Cardiac 3 Catheterization in Kawasaki Disease registry

4 Julia Weisser<sup>1</sup>, Leonie Arnold<sup>1</sup>, Wolfgang Wällisch<sup>2</sup>, Daniel Quandt<sup>3</sup>, Bernd Opgen-Rhein<sup>4</sup>,  
5 Frank-Thomas Riede<sup>5</sup>, Florentine Gräfe<sup>5</sup>, Jörg Michel<sup>6</sup>, Raoul Arnold<sup>7</sup>, Heike Schneider<sup>8</sup>,  
6 Daniel Tanase<sup>9</sup>, Ulrike Herberg<sup>10</sup>, Christoph Happel<sup>11</sup>, Mali Tietje<sup>12</sup>, Gleb Tarusinov<sup>12</sup>, Jochen  
7 Grohmann<sup>13</sup>, Johanna Hummel<sup>13</sup>, André Rudolph<sup>14</sup>, Nikolaus Haas<sup>1</sup>, André Jakob<sup>1</sup>

## 8 Affiliations:

9 <sup>1</sup>Department of Pediatric Cardiology and Pediatric Intensive Care, Ludwig-Maximilians-  
10 Universität München, Marchioninistraße 15, 81377 München, Germany

11 <sup>2</sup>Department of Pediatric Cardiology, Universität Erlangen, Loschgestraße 15, 91054  
12 Erlangen, Germany

13 <sup>3</sup>Department of Pediatric Cardiology, Kinderspital Zürich, Steinwiesstraße 75, 8032 Zürich,  
14 Switzerland

15 <sup>4</sup>Department of Pediatrics, Charité Berlin, Augustenburgerplatz 1, 13353 Berlin, Germany

16 <sup>5</sup>Department of Pediatric Cardiology, Herzzentrum Leipzig, Strümpellstraße 39, 04289  
17 Leipzig, Germany

18 <sup>6</sup>Department of Pediatric Cardiology, Pulmonology and Pediatric Intensive Care Medicine,  
19 University Children's Hospital Tübingen, Hoppe-Seyler-Str.1, 72076 Tübingen, Germany

20 <sup>7</sup>Department of Pediatric Cardiology, Universitätsklinikum Heidelberg, Im Neuenheimer Feld  
21 430, 69120 Heidelberg, Germany

22 <sup>8</sup>Kinderherzkllinik UM Göttingen, Robert-Koch-Straße 40, 37075 Göttingen, Germany

23 <sup>9</sup>Department of Pediatric Cardiology, Deutsches Herzzentrum München, Lazarettstraße 36,  
24 80636 München, Germany

25 <sup>10</sup>Department of Pediatric Cardiology and Congenital Heart Disease, Universitätsklinikum  
26 RWTH Aachen, Pauwelsstraße 30, 52074 Aachen

27 <sup>11</sup>Department of Pediatric Cardiology, MH Hannover, Carl-Neuberg-Straße 1, 30625  
28 Hannover, Germany

29 <sup>12</sup>Department of Pediatric Cardiology, Herzzentrum Duisburg, Gerrickstraße 21, 47137  
30 Duisburg, Germany

31 <sup>13</sup>Department of Congenital Heart Disease/Pediatric Cardiology, Heart and Diabetes Center  
32 NRW, Ruhr-University Bochum, Georgstraße 11, 32545 Bad Oeyenhausen

33 <sup>14</sup>Pediatric Heart Center, Astrid Lindgren Children's Hospital, Karolinska University Hospital,  
34 Eugeniavägen 23, 171 64 Stockholm, Sweden

NOTE: This preprint reports new research that has not been certified by peer review and should not be used to guide clinical practice.

35

36 **Abbreviated title:** Cardiac catheterization in Kawasaki disease

37 **Corresponding Author:** André Jakob, Department of Pediatric Cardiology and Pediatric  
38 Intensive Care, Ludwig-Maximilians-Universität München, Marchioninistr. 15, 81377  
39 München, Germany E-Mail: [andre.jakob@med.uni-muenchen.de](mailto:andre.jakob@med.uni-muenchen.de), Tel,; +49 89 4400 73941

40 **Total word count of the manuscript:** 5210

41

42 **Abstract**

43 **Aims and Background:** Patients with a history of Kawasaki disease (KD), especially those with  
44 diagnosed coronary artery involvement, are known to require long-term cardiac care.  
45 However, specific evidence-based recommendations on long-term medical strategies are  
46 missing. Cardiac catheterization (CC) is still considered the gold-standard for diagnosing  
47 detailed coronary pathology. Therefore, and to better understand coronary artery pathology  
48 development in the long-term, we conducted a survey to document and evaluate CC data in  
49 a European population. Here we describe initial data on the first catheter examination these  
50 patients underwent.

51 **Method:** We administered a standardized questionnaire to retrospectively analyze CC data  
52 from KD children from the year 2010 until April 2023. This register covers basic acute phase  
53 clinical data and, more importantly, detailed information on morphology, distribution and  
54 the development of coronary artery pathologies. Data on participating departments of  
55 pediatric cardiology, mainly from Germany, were evaluated, with this study focusing on  
56 investigating each patient's first CC exclusively.

57 **Results:** We analyzed a total of 164, mainly Caucasian, patients (65% male) across 14  
58 pediatric cardiology departments. A relevant number of patients had no coronary artery  
59 aneurysm at the CC, facing the fact that distal CAAs were almost exclusively detected  
60 alongside proximal CAAs. Patients with multiple CAAs revealed a significant positive  
61 correlation between the number of CAAs and their dimensions, in diameter, as in length.  
62 Location of the CAA within the coronary artery, age at KD's onset or gender did not  
63 significantly influence CAA diameters, but CAAs were longer in older children and in males.

64 **Conclusion:** The fact of distal CAAs being only present together with proximal ones, will  
65 hopefully reduce diagnostic CCs in KD patients without echocardiographically detected  
66 proximal CAAs. Furthermore this study gives valuable insights into dimensional specifics of  
67 CAAs in KD patients. As an ongoing register, future analyses will further explore long-term  
68 outcomes and performed treatments, helping to refine clinical long-term strategies for KD  
69 patients.

70

71 **Clinical perspective:**

- 72 • In Caucasian Kawasaki disease (KD) patients, distal coronary artery aneurysms (CAA)  
73 are usually diagnosed in association with proximal CAAs. Additional imaging such as  
74 conventional coronary artery angiography may therefore be unnecessary, if no  
75 aneurysms are detectable echocardiographically.
- 76 • In this context, potentially unnecessary CCs hopefully will reduce in future.
- 77 • Not only the CAA diameters, but also CAA length and CAA count may influence  
78 cardiac related morbidity and should be considered in long-term follow-up care.
- 79 • The age at the acute phase of KD, such as gender and location of CAA within the  
80 coronary arteries seems to not affect CAA dimensions.

81

82 **Clinical Trial Registration:**

83 Cardiac Catheterization in Kawasaki Disease – data from the central European registry from  
84 2010 - today

85 DRKS-ID: DRKS00031022, Date of Registration: 16.01.2023

86 **Non-standard Abbreviations and Acronyms:**

87 KD= Kawasaki Disease

88 CC= Cardiac Catheterization

89 CAA= Coronary Artery Aneurysm

90 AP= Acute Phase

91 IVIG= Intravenous Immunoglobulin

92 AHA= American Heart Association

93 JCS= Japanese Circulation Society

94 IQR= Interquartile Range

95 BSA= Body Surface Area

96 RCA= Right Coronary Artery

97 LCA= Left Coronary Artery

98 LAD= Left Anterior Descending Coronary Artery

99 LCX= Left Circumflex Coronary Artery

100 SNP= Single Nucleotide Polymorphism

101 ITPKC= Inositol 1,4,5-trisphosphate 3-kinase C

102 MMP= Matrix Metalloproteinases

103

104 **Introduction:**

105 The incidence of cardiovascular complications associated with Kawasaki Disease (KD) has  
106 significantly dropped<sup>2, 3</sup> with improved early diagnosis and standardized therapeutic  
107 strategies, particularly the use of intravenous immunoglobulin (IVIG) and steroid treatment  
108 during the disease's acute phase (AP). Cardiac involvement during the AP of KD was recently  
109 diagnosed in under 10%, with about a third of patients suffering from long-term  
110 cardiovascular sequelae. Though coronary artery dilatations/aneurysms (CAAs) are the main  
111 manifestations, valvular lesions, vascular stenosis and, rarely, myocardial infarction are also  
112 being reported<sup>2, 4</sup>.

113 Most CAAs caused by KD develop during its AP. Newly dilated coronary arterial lesions are  
114 rarely detected in KD's late period. Various molecular etiopathogeneses seem to apply  
115 depending on the CAAs diameter, having an impact on long-term vascular sequelae. KD  
116 CAAs, especially those with large diameters, are primarily attributed to necrotizing arteritis  
117 characterized by severe inflammation and damage to the arterial walls. Due to chronic  
118 vasculitis, i.e. smaller aneurysms can also form in KD's later stages and rarely even redevelop  
119 out of previously regressed CAAs<sup>5</sup>. Aneurysms with diameters considered to be small or  
120 medium are known to downsize, whereas giant CAAs do not tend to regress<sup>6-9</sup>.

121 Patients with a KD history, especially those with diagnosed coronary artery involvement,  
122 require long-term cardiac care. CC remains the gold standard for thorough coronary artery  
123 evaluation in adults; but for children with a history of KD, there is no universal consensus  
124 regarding CC's diagnostic necessity. Existing KD-specific guidelines, with the American Heart  
125 Association's (AHA) and Japanese Circulation Society's (JCS) being the most consulted,  
126 recommend different approaches. The AHA's guidelines, apparently taking a more restrictive  
127 approach on CC, suggest that it is optional for children with large coronary artery aneurysms  
128 ( $\geq 8\text{mm}/Z\text{-Score} \geq 10$ ) during the first year after the disease's AP. According to the AHA, CC  
129 can be done as follow-up procedure to assess the progression or resolution of aneurysms  
130 over time for long-term monitoring of known persisting CAA. On the other hand, the JCS  
131 recommends that all patients diagnosed with a CAA exceeding 6 mm undergo at least one CC  
132 during the early convalescent phase of their disease. This suggests a more proactive  
133 approach to CC by recommending the procedure for a broader range of aneurysm sizes. The  
134 JCS also advises one follow-up CC when no further dilatation is echocardiographically

135 apparent, most likely to confirm the former coronary pathology's stability. German  
136 guidelines tend to follow the AHA's risk stratification; there is international consensus that  
137 during KD's acute inflammatory stage, interventional CC should only be done when there is  
138 evidence of myocardial ischaemia<sup>2, 9-12</sup>.

139 We have little evidence of long-term outcomes after KD, particularly of a predominantly  
140 Caucasian population. To address this gap, we initiated a register for CCs performed on  
141 patients with a history of KD in central Europe. This study was initiated by the working-group  
142 of interventional pediatric cardiologists endorsed by the German Society of Pediatric  
143 Cardiology and Congenital Heart Defects including participants from Austria and Switzerland.  
144 This register is open to any center to participate. A standardized questionnaire focused on  
145 detailed characterization of diagnostic CC outcomes, on interventions and the  
146 pharmacological strategies these KD patients experienced. In this present study we analyzed  
147 data on each reported KD patient's first CC, focusing on a specific characterization of existing  
148 coronary artery pathologies.

149

## 150 **Material and Methods:**

151 This multicentric register study functions as a retrospective surveillance study for CCs done  
152 on children with a history of KD. The participating centers are requested to report data on all  
153 CC procedures conducted from 2010 onwards.

154 As of now, we have acquired data from 14 departments of pediatric cardiology, with 12  
155 thereof in Germany, one from Switzerland and another from Sweden.

156 A standardized questionnaire addresses patients' anthropometry as the main AP clinical  
157 characteristics, i.e., whether the CAA was already present during KD's acute stage and  
158 whether IVIG had been administered. The questionnaire's principal focus was on a detailed  
159 description of detected coronary artery pathologies: the number of CAAs present, including  
160 their specific location and each aneurysm's diameter and length. As the AHA's coronary  
161 segment classification<sup>1</sup> was applied to assess the CAA's location, pathologies were allocated  
162 not only to one of the coronary arteries' main branches, but to one of 12 specific segments.  
163 This distinction enabled both more specific CAA location assessment and differentiation  
164 between proximal and distal CAAs. Striving for an age-and-body size-independent coronary

165 diameter evaluation, the CAAs' diameters were transferred to a coronary artery Z-Score via  
166 calculation proposed by Dallaire et al.<sup>13</sup>, acknowledging that these Z-Scores were originally  
167 applied for echocardiographic evaluation and primarily proximal coronary artery segments  
168 only. The aneurysm's length was determined by its absolute extent. The data in this study  
169 focusses on the patients' initial CC procedure.

#### 170 Statistical Analysis:

171 The data's distribution was tested using QQ plots and Shapiro-Wilk tests. Data are presented  
172 as median and interquartile range (IQR) or median and range. Categorical variables were  
173 reported as absolute numbers along with their respective percentages. To analyze the  
174 aneurysms' extent, their maximum Z-Score was calculated also including their absolute  
175 diameters and length. We relied on the largest CAA (maximum diameter/length) or mean of  
176 all CAAs present (mean diameter/length) for our analysis of patients with multiple CAAs. The  
177 number of CAAs per patient was determined by adding together all CAAs regardless of their  
178 location. We ran a Kendall rank correlation to investigate the relationship between the CAA  
179 number/s per patient and maximum Z-Score or length. The coherence of the CAAs' diameter  
180 and length, absolute dimensions and body surface area (BSA) adapted measurements, with  
181 the patients' sex and their age at AP was analyzed by Kendall Tau, the Wilcoxon rank sum  
182 test and linear regression adjusted for BSA. Models for CAA dimensions and age at AP were  
183 not corrected for BSA due to a strong correlation between BSA and age at AP.

184 CAAs' distribution per coronary artery branch was presented with their absolute count  
185 accompanied by their affiliated diameter and length. Z-Scores were presented as boxplots,  
186 one specifically assigned for each segment. For patients diagnosed with more than one CAA  
187 in a single segment, the larger one served for these size assessments. The Chi-square test  
188 was done to compare the occurrence of CAAs in proximal versus distal segments. Segments  
189 1, 5, 6 and 11 were defined as proximal, CAAs affecting segments 2, 3, 4, 7, 8, 9, 10 and 12  
190 were considered to be distally located. All data was analyzed in R 4.2.2 (R Core Team, 2022  
191 Vienna, Austria).

#### 192 **Results:**

##### 193 General population:



194 Our study includes a total of 164 patients, most of whom are male (65%). Median age at the  
195 time of catheterization was 3 years and 7 months; the time interval between the disease's  
196 AP and patient's first CC varied widely, ranging from month 0 to nearly 21 years. Median age  
197 at AP was 20 months, and 37.2% of the patients had been diagnosed with incomplete KD.  
198 Details on our patient cohort are in Table 1.

199 Specific questions addressed the existence of CAAs already present during the AP of KD. Put  
200 into relation to the number of CAAs present at time of AP, Figure 1 depicts CAAs detected at  
201 CC - revealing that 108 out of 138 (78,3%) had verified CAA early in the course of KD, but of  
202 all 164 patients, 77 (46.9%) had at least one CAA at their first CC. Among the patients initially  
203 diagnosed with CAA, approximately 48.1% (52 out of 108) no longer revealed coronary  
204 artery involvement via CC, indicating a relevant CAA regression rate. Only six patients had  
205 CAAs primarily detected during the CC, with five of them undergoing their initial CC within 4  
206 months after the AP. An RCA aneurysm was detected at the CC performed 39 months after  
207 the AP of one patient only.

## 208 2. CAA(s) – numbers and allocation:

209 Further analysis focused on detailed descriptions of the CAAs detected in 77 patients.  
210 Regarding the number of CAAs per patient, 57 out of 77 (74.0 %) had multiple CAAs. Two  
211 simultaneous CAAs were diagnosed in 22 patients, three in 20 patients. 10 patients were  
212 diagnosed with more than four simultaneous CAA, with eight the highest number of CAAs in  
213 a single patient.

214 With many patients having numerous CAAs, our study cohort comprises a total of 203 CAAs.  
215 With 87 CAAs located in the RCA and 116 CAAs in the left coronary artery, the distribution of  
216 these aneurysms is roughly equal between the two sides. To more precisely allocate the  
217 CAAs, we assigned them to one specific coronary artery segment applying the AHA's  
218 classification<sup>1</sup>. CAAs continuously extending over more than one segment qualified as  
219 multiple segments. The exact number of aneurysms identified in each segment is found in  
220 Figure 2. The proximal RCA (segment 1) is the one most frequently affected by CAAs,  
221 followed by the proximal part of the left anterior descending coronary artery (LAD) (segment  
222 6). Distal coronary artery segments seldom reveal CAAs according to our register's data.

223 Not only do distal segments not tend to develop CAAs, there is distal coronary artery  
224 involvement almost exclusively when a CAA is also detected in one of the respective  
225 proximal segments (see Table 2). We further analysed the presence of distal CAAs in relation  
226 to coexisting proximal CAAs in any of the main coronary arteries, identifying only one patient  
227 who seemed to have developed an isolated distal RCA-CAA (location: segment 3;  
228 dimensions: diameter 4.4 mm/Z-Score 5.9 x length 4.4mm). However, this one was a “non-  
229 detected KD” patient suffering from acute coronary ischemia caused by a complete  
230 thrombotic LAD-occlusion, he was assumed to have also had an underlying corresponding  
231 proximal LAD aneurysm. None of our register patients presented an isolated distal CAA.

### 232 CAA(s) – sizes and dimensional distribution

233 Regarding CAA dimensions, we documented a significant range of CAA sizes in diameter and  
234 length. The largest CAA was located in the RCA, measuring 33.0 mm (Z-Score 78.3) in  
235 diameter and 85.0 mm in length. Each coronary artery’s specific CAA dimensions are listed in  
236 Table 3. Besides the largest aneurysm present in the RCA, we found no significant difference  
237 in CAA diameters and lengths among all the main coronary arteries.

238 Although proximal segments develop CAAs more frequently, the aneurysm’s size does not  
239 seem to be influenced by its distance from the coronary artery’s origin, meaning that  
240 proximal CAAs are on average not significantly larger than more distally located ones.  
241 However, giant-sized CAAs are indeed primarily detected in proximal coronary artery  
242 segments (Figure 3).

243 We also analyzed potential CAA size-influencing factors. The number of CAAs diagnosed in a  
244 single patient indicates a significant positive correlation with both CAA diameter ( $R=0.45$ ,  
245  $p=0,0031$ ) and its length ( $R=0.34$ ,  $p = 0.00045$ ). The more aneurysms a patient has, the larger  
246 they are (see Figure 4).

247 Moreover the influence of sex and age during the AP of KD on CAA development was  
248 investigated. As expected, older patients present larger CAAs than younger patients in  
249 absolute-dimension terms, demonstrated by a moderately significant correlation between  
250 age and CAA dimensions. This correlation disappears when accounting for a patient’s BSA via  
251 coronary artery Z-Scores. We also examined the influence of gender and age on the  
252 diameter of each patient’s largest (or only) CAA (max. diameter/length) and their patient-

253 specific means (mean diameter/length). In terms of the aneurysms' length, there is no  
254 adjustment for BSA. However, our register's data showed that the older the patients are, the  
255 longer their CAAs are as well. Furthermore, boys seem to develop significant longer CAAs  
256 than girls. The total number of CAAs on the other hand, does not seem to be influenced by  
257 either sex or age at disease onset (see Table 4).

258

## 259 **Discussion:**

260 This study describes a total of 164 patients from several pediatric cardiology departments.  
261 With two university hospitals outside Germany participating, this register study represents  
262 KD in mainly Caucasian patients. Our data analysis reveals several key findings. This study  
263 demonstrates a considerable regression rate in the numbers of CAAs when comparing CAA  
264 numbers from the AP to those in the first CC, confirming established evidence from older  
265 Japanese CC data<sup>7, 8</sup>. The development rate of new CAAs is low throughout their later stages  
266 - 3% according to our data. As our data analysis concentrated mainly on elaborating upon  
267 CAA morphology based on CC measurements, only patients with available data from specific  
268 CAA(s), such as size and location, were included in further analyses. Studying the numbers of  
269 CAAs locally, we identified aneurysms distributed about equally to both coronary arteries,  
270 with the proximal RCA segment revealing most CAAs. Distal CAAs were diagnosed almost  
271 exclusively when there was an additional coronary artery pathology in a proximal segment -  
272 in fact, this cohort presented no isolated distal CAA. The rarity of distal aneurysms seems to  
273 be generally accepted, as it is also reflected in the AHA KD guidelines<sup>9</sup>. However, there is no  
274 concrete reference, and little research has been done on this topic to support this finding.  
275 Most data relies on CT imaging, confirming distal-only CAAs as rare, as did a recent study  
276 evaluating CT coronary angiography in Indian children with KD<sup>14</sup>. Their study included  
277 23/176 patients diagnosed with distal CAA(s), four of them had isolated distal coronary  
278 artery pathologies. A coexisting proximal CAA was detected in 19 other patients, or proximal  
279 CAAs that contiguously affected also distal segments. Despite these findings, there is a  
280 paucity of reliable data on the occurrence of distal KD-linked coronary artery abnormalities,  
281 with the great majority of current data from findings from studies on Asian children. The  
282 significant difference in KD incidence among ethnicities, i.e. 254/100.000 in Japan and 6-  
283 7/100.000 in Germany highlighting the importance of ethnic-specific data, especially for KD  
284 children of predominantly Caucasian origin<sup>9, 15, 16</sup>.

285 A considerable number of our patients suffered from multiple simultaneous CAAs, with their  
286 number correlating positively with their CAA's diameters and lengths. Boys and older  
287 children reveal significantly longer CAAs (noting that these specific parameters were not  
288 BSA-adjusted). The aneurysm's length, especially its pathological impact on cardiac  
289 morbidity, has not been adequately assessed to date. The number and diameters of CAAs do  
290 not seem to be influenced by either age during the disease's AP or the patient's gender.  
291 Moreover, our data indicates that CAA size seems to be independent of its location. CAA  
292 dimensions did not differ in relation to the segment in which they had developed. This may  
293 indicate that although distal CAAs are rarer, they can still develop large dimensions and thus  
294 have a direct impact on KD patients' long-term clinical outcomes.

295 The understanding of CAA pathogenesis in KD remains limited. Initially, mouse model data  
296 indicated that certain factors, including IL- $\beta$ 17 and Single Nucleotide Polymorphisms (SNPs)  
297 in various genes, such as inositol 1,4,5-trisphosphate 3-kinase C (ITPKC) and the TIFAB gene,  
298 play a role in predisposing individuals to KD and increasing the risk of CAA formation<sup>17-20</sup>.  
299 Additionally, the expression of CD40 Ligand on CD4+ T-cells and platelets, as well as an  
300 imbalance in the levels of matrix metalloproteinases (MMPs) and tissue inhibitors of MMPs,  
301 may also influence the extent of coronary artery involvement in KD<sup>21</sup>.

302 While some data on the acute formation of CAAs exist, our molecular knowledge of long-  
303 term CAA development is notably lacking. A comprehensive understanding of the  
304 morphology of CAAs in the long term is essential not only for optimizing long-term clinical  
305 management but also for shedding light on the molecular pathomechanisms underlying CAA  
306 development.

307 Monitoring and correctly assessing the severity of CAAs in KD patients, echocardiography is  
308 the preferred noninvasive diagnostic tool. It is performed at the disease's onset and should  
309 be repeated according to the patient's clinical presentation and follow-up evaluation later  
310 on. While it effectively reveals coronary artery involvement and usually enables assessment  
311 of the disease's severity, its sensitivity and specificity in determining distal coronary artery  
312 involvement as for detecting coronary artery stenosis and thrombosis are limited<sup>22 23</sup>. CC is  
313 generally still considered the "gold standard" for thorough evaluation of coronary arteries in  
314 KD. However, CTCA has proven to be of similar diagnostic efficacy as CC. In fact, CTCA may  
315 even be more precise, particularly for visualization of distal coronary arteries and intramural

316 anomalies<sup>24-28</sup>. Radiation exposure is considered to be similar in both procedures<sup>28</sup>. MRCA,  
317 while radiation-free, has limited capacity to visualize distal segments, but it may be  
318 beneficial for patients with severe intramural calcifications, providing simultaneous  
319 information on cardiac function<sup>28</sup>.

320 This register study primarily aimed for a detailed (not favorizing) review of CC findings in  
321 European patients diagnosed with KD specifically. CC can help to determine the severity of  
322 KD's cardiac involvement, but alternative angiographic methods (also as substitute  
323 strategies), should always be considered keeping CC's strengths and limitations in mind. As a  
324 general rule, the application of CC use should be clearly indicated especially as proximal  
325 CAAs are sufficiently diagnosed echocardiographically. The number of possibly non-essential  
326 CCs seems to have already dropped over the years. Comparing this study's data to Japanese  
327 cardiac catheterization data from of the 1970s<sup>8</sup> and -80s<sup>13</sup> (when echocardiography was not  
328 universally available or precise enough), the rate of CCs revealing only the absence of  
329 coronary artery damage has more than halved. Stricter indications and better alternative  
330 evaluation methods can be considered potentially causative factors behind this trend.  
331 Although we still lack clear guidelines (for central European patients specifically), the  
332 number of CCs done in children presenting no coronary artery involvement (88 of 164 =  
333 53,7%) remains fairly high. Considering CCs done mainly between 2010 and 2022, note that  
334 the mean rate of CCs without any CAA detection per year varied from 62,5% in 2011 and  
335 25,0% in 2022, indicating a reduction in potentially unnecessary CCs. We hope with the data  
336 provided, future analysis hopefully will demonstrate a further and significant drop of this  
337 number.

338 Data of this study was acquired retrospectively by standardized questionnaires, data quality  
339 therefor depends on the reporting physicians themselves and could not be uniformly  
340 verified. Furthermore few aspects such as the CC's indication were not evaluable, mostly  
341 applying to open question types. Aiming for a high total of analyzed CCs (and that our  
342 registry study's primary aim was to address CC findings), we were only able to sketch other  
343 disease aspects such as AP data and treatment strategies. We could not compare  
344 angiographic CAA measurements to their dimensions during the AP, as initial  
345 echocardiographic data was not universally available. Nevertheless our register was  
346 established to primarily collect specific, mostly CC related data on mainly Caucasian children

347 suffering from KD, giving valuable insights to specific CAA data, to optionally influence local  
348 adaptations of follow-up clinical strategies.

### 349 **Acknowledgments, Sources of Funding, & Disclosures**

350 Acknowledgments: We thank all participating centers for providing valuable data and  
351 detailed information on cardiac catheterizations. We also thank the German Society of  
352 Pediatric Cardiology for supporting this registry.

353 Source of Funding: None

354 Disclosures: None

355

356 **References:**

- 357 1. AHA. Aha coronary segment classification.
- 358 2. Group JJW. Guidelines for diagnosis and management of cardiovascular sequelae in kawasaki  
359 disease (jcs 2013). Digest version. *Circulation Journal*. 2014;78:2521-2562
- 360 3. Newburger JW, Takahashi M, Beiser AS, Burns JC, Bastian J, Chung KJ, et al. A single  
361 intravenous infusion of gamma globulin as compared with four infusions in the treatment of  
362 acute kawasaki syndrome. *N Engl J Med*. 1991;324:1633-1639
- 363 4. Nakamura Y, Yashiro M, Uehara R, Sadakane A, Tsuboi S, Aoyama Y, et al. Epidemiologic  
364 features of kawasaki disease in japan: Results of the 2009-2010 nationwide survey. *J*  
365 *Epidemiol*. 2012;22:216-221
- 366 5. Tsuda E, Kamiya T, Ono Y, Kimura K, Echigo S. Dilated coronary arterial lesions in the late  
367 period after kawasaki disease. *Heart*. 2005;91:177-182
- 368 6. Kato H, Koike S, Yamamoto M, Ito Y, Yano E. Coronary aneurysms in infants and young  
369 children with acute febrile mucocutaneous lymph node syndrome. *J Pediatr*. 1975;86:892-  
370 898
- 371 7. Kato H, Sugimura T, Akagi T, Sato N, Hashino K, Maeno Y, et al. Long-term consequences of  
372 kawasaki disease. A 10- to 21-year follow-up study of 594 patients. *Circulation*.  
373 1996;94:1379-1385
- 374 8. Kato H, Ichinose E, Yoshioka F, Takechi T, Matsunaga S, Suzuki K, et al. Fate of coronary  
375 aneurysms in kawasaki disease: Serial coronary angiography and long-term follow-up study.  
376 *Am J Cardiol*. 1982;49:1758-1766
- 377 9. McCrindle BW, Rowley AH, Newburger JW, Burns JC, Bolger AF, Gewitz M, et al. Diagnosis,  
378 treatment, and long-term management of kawasaki disease: A scientific statement for health  
379 professionals from the american heart association. *Circulation*. 2017;135:e927-e999
- 380 10. Newburger JW, Takahashi M, Gerber MA, Gewitz MH, Tani LY, Burns JC, et al. Diagnosis,  
381 treatment, and long-term management of kawasaki disease: A statement for health  
382 professionals from the committee on rheumatic fever, endocarditis, and kawasaki disease,  
383 council on cardiovascular disease in the young, american heart association. *Pediatrics*.  
384 2004;114:1708-1733
- 385 11. Neudorf U, Jakob A, Lilienthal E, Hospach T. *Leitlinie der gesellschaft für kinder-und*  
386 *jugendrheumatologie und der deutschen gesellschaft für pädiatrische kardiologie und*  
387 *angeborene herzfehler-kawasaki syndrom*. 2019.
- 388 12. Scherler L, Haas NA, Tengler A, Pattathu J, Mandilaras G, Jakob A. Acute phase of kawasaki  
389 disease: A review of national guideline recommendations. *Eur J Pediatr*. 2022;181:2563-2573
- 390 13. Dallaire F, Dahdah N. New equations and a critical appraisal of coronary artery z scores in  
391 healthy children. *J Am Soc Echocardiogr*. 2011;24:60-74
- 392 14. Singhal M, Paliana RK, Jindal AK, Gupta A, Sharma A, Guleria S, et al. Distal coronary artery  
393 abnormalities in kawasaki disease: Experience on ct coronary angiography in 176 children.  
394 *Rheumatology (Oxford)*. 2023;62:815-823
- 395 15. Makino N, Nakamura Y, Yashiro M, Ae R, Tsuboi S, Aoyama Y, et al. Descriptive epidemiology  
396 of kawasaki disease in japan, 2011-2012: From the results of the 22nd nationwide survey. *J*  
397 *Epidemiol*. 2015;25:239-245
- 398 16. Jakob A, Whelan J, Kordecki M, Berner R, Stiller B, Arnold R, et al. Kawasaki disease in  
399 germany: A prospective, population-based study adjusted for underreporting. *Pediatr Infect*  
400 *Dis J*. 2016;35:129-134
- 401 17. Onouchi Y, Gunji T, Burns JC, Shimizu C, Newburger JW, Yashiro M, et al. Itpkc functional  
402 polymorphism associated with kawasaki disease susceptibility and formation of coronary  
403 artery aneurysms. *Nat Genet*. 2008;40:35-42
- 404 18. Kuo HC, Yang KD, Juo SH, Liang CD, Chen WC, Wang YS, et al. Itpkc single nucleotide  
405 polymorphism associated with the kawasaki disease in a taiwanese population. *PLoS One*.  
406 2011;6:e17370

- 407 19. Kwon YC, Kim JJ, Yu JJ, Yun SW, Yoon KL, Lee KY, et al. Identification of the tifab gene as a  
408 susceptibility locus for coronary artery aneurysm in patients with kawasaki disease. *Pediatr*  
409 *Cardiol.* 2019;40:483-488
- 410 20. Noval Rivas M, Arditi M. Kawasaki disease: Pathophysiology and insights from mouse models.  
411 *Nat Rev Rheumatol.* 2020;16:391-405
- 412 21. Senzaki H. The pathophysiology of coronary artery aneurysms in kawasaki disease: Role of  
413 matrix metalloproteinases. *Arch Dis Child.* 2006;91:847-851
- 414 22. Yu Y, Sun K, Wang R, Li Y, Xue H, Yu L, et al. Comparison study of echocardiography and dual-  
415 source ct in diagnosis of coronary artery aneurysm due to kawasaki disease: Coronary artery  
416 disease. *Echocardiography.* 2011;28:1025-1034
- 417 23. Capannari TE, Daniels SR, Meyer RA, Schwartz DC, Kaplan S. Sensitivity, specificity and  
418 predictive value of two-dimensional echocardiography in detecting coronary artery  
419 aneurysms in patients with kawasaki disease. *J Am Coll Cardiol.* 1986;7:355-360
- 420 24. Wu MT, Hsieh KS, Lin CC, Yang CF, Pan HB. Images in cardiovascular medicine. Evaluation of  
421 coronary artery aneurysms in kawasaki disease by multislice computed tomographic  
422 coronary angiography. *Circulation.* 2004;110:e339
- 423 25. Chu WC, Mok GC, Lam WW, Yam MC, Sung RY. Assessment of coronary artery aneurysms in  
424 paediatric patients with kawasaki disease by multidetector row ct angiography: Feasibility  
425 and comparison with 2d echocardiography. *Pediatr Radiol.* 2006;36:1148-1153
- 426 26. Tsujii N, Tsuda E, Kanzaki S, Kurosaki K. Measurements of coronary artery aneurysms due to  
427 kawasaki disease by dual-source computed tomography (dsct). *Pediatr Cardiol.* 2016;37:442-  
428 447
- 429 27. Kim JW, Goo HW. Coronary artery abnormalities in kawasaki disease: Comparison between ct  
430 and mr coronary angiography. *Acta Radiol.* 2013;54:156-163
- 431 28. Singhal M, Gupta P, Singh S, Khandelwal N. Computed tomography coronary angiography is  
432 the way forward for evaluation of children with kawasaki disease. *Glob Cardiol Sci Pract.*  
433 2017;2017:e201728

434



435 **Tables:**

| <b>Patients' characteristics</b>          |                   |
|-------------------------------------------|-------------------|
| Number/sex of patients: n(m/f/missing)    | 164 (107/38/19)   |
| Diagnosis: Complete/incomplete KD/missing | 85/61/18          |
| Age at AP: Median (range)                 | 20 (0-243) months |
| Age at CC: Median (range)                 | 43 (0-312) months |
| Δ Time AP – 1. CC: Median (range)         | 8 (0-251) months  |

436 *Table 1: General population data*

437

| <b>Proximal vs. distal CAA occurrence</b> |            |                  |             |                                  |
|-------------------------------------------|------------|------------------|-------------|----------------------------------|
|                                           | Only prox. | prox. and distal | Only distal | Prox. And distal vs. only distal |
| RCA                                       | 38         | 18               | 2           | p-value<0.001                    |
| LAD                                       | 39         | 10               | 0           | p-value<0.001                    |
| LCX                                       | 19         | 1                | 2           | p-value<0.001                    |

438 *Table 2: Occurrence of proximal and distal CAAs. Isolated distal CAAs vs. distal and*  
 439 *concurring proximal CAAs in the same coronary artery (p-values according to Fisher's exact*  
 440 *test)*

441

| <b>CAAs' characteristics per coronary artery main branch</b> |                |                |                |                |
|--------------------------------------------------------------|----------------|----------------|----------------|----------------|
|                                                              | RCA            | LCA            | LAD            | LCX            |
| Total number (n)                                             | 87             | 29             | 61             | 26             |
| -with size specification (n)                                 | 83             | 25             | 56             | 21             |
| Diameter (mm): Median (range)                                | 6.0 (1.9-33.0) | 5.8 (2.5-25.0) | 5.5 (2.2-22.0) | 4.0 (2.3-11.0) |
| Z-Score: Median (range)                                      | 9.7 (2.5-78.3) | 8.6 (3.4-65.8) | 8.4 (2.6-46.9) | 5.7 (2.8-27.1) |
| Length: Median (range)                                       | 9.0 (2.0-85.0) | 8.5 (3.0-30.0) | 8.0 (1.3-85.0) | 6.0 (2.7-30.0) |

442 *Table 3: CAA distribution with dimensional measurements*

443

| Impact of gender/age at AP on CAA characteristics |                  |                 |                                                                 |                               |         |
|---------------------------------------------------|------------------|-----------------|-----------------------------------------------------------------|-------------------------------|---------|
|                                                   | Male             | female          |                                                                 | Age at AP                     |         |
|                                                   | Median<br>(IQR)  | Median<br>(IQR) | p-value<br>(Wilcoxon<br>rank sum test/<br>linear<br>regression) | Kendall<br>Correlation<br>(R) | p-value |
| Max. diameter                                     |                  |                 |                                                                 |                               |         |
| -Z-Score                                          | 10.81 ±<br>8.28  | 9.34 ± 6.74     | 0.860                                                           | 0.07                          | 0.460   |
| -absolute<br>dimension                            | 7.20 ± 5.26      | 6.00 ± 4.54     | 0.682                                                           | 0.21                          | 0.015   |
| Mean diameter                                     |                  |                 |                                                                 |                               |         |
| -Z-Score                                          | 8.23 ± 5.02      | 8.12 ± 3.60     | 0.972                                                           | 0.07                          | 0.440   |
| -absolute<br>dimension                            | 5.54 ± 3.67      | 5.00 ± 2.06     | 0.543                                                           | 0.27                          | 0.002   |
| Mean length                                       | 10.00 ±<br>8.30  | 8.75 ± 3.72     | 0.162                                                           | 0.32                          | < 0.001 |
| Max length                                        | 13.15 ±<br>16.95 | 13.80 ±<br>7.40 | 0.133                                                           | 0.27                          | 0.003   |
| CAA count                                         | 2.78 ± 1.79      | 2.56 ± 1.50     | 0.610                                                           | 0.06                          | 0.510   |

444 *Table 4 Median diameter/length and numbers of all CAAs per patient comparing boys and*  
 445 *girls indicating a significant difference in CAA length and Kendall's correlation coefficient (R)*  
 446 *with patient age at AP indicating no significant correlation between body size adapted Z-*  
 447 *scores/CAA count and the age . CAA= coronary artery aneurysm, IQR= Interquartile range.*

448

449 **Figures:**

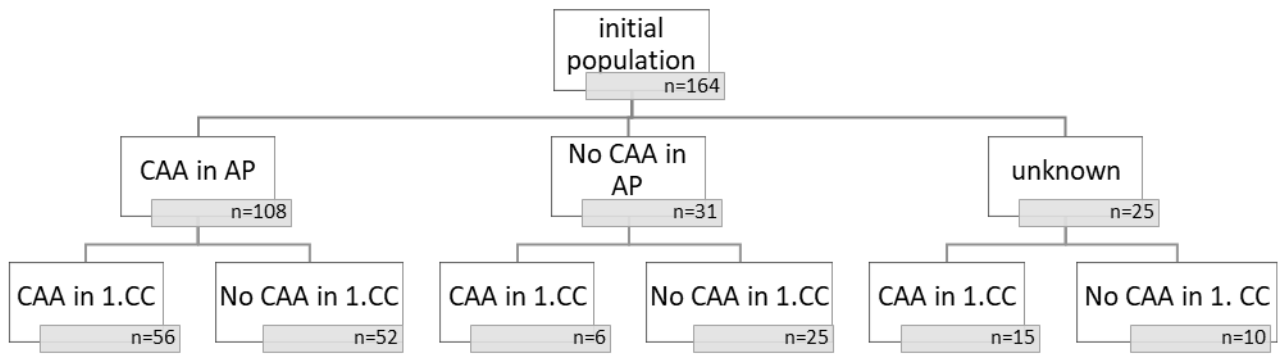

450

451 *Figure 1 Flow chart - CAA in AP/ 1. CC; CAA= Coronary artery aneurysm, CC= Cardiac*  
452 *catheterization, AP= Acute Phase*

453



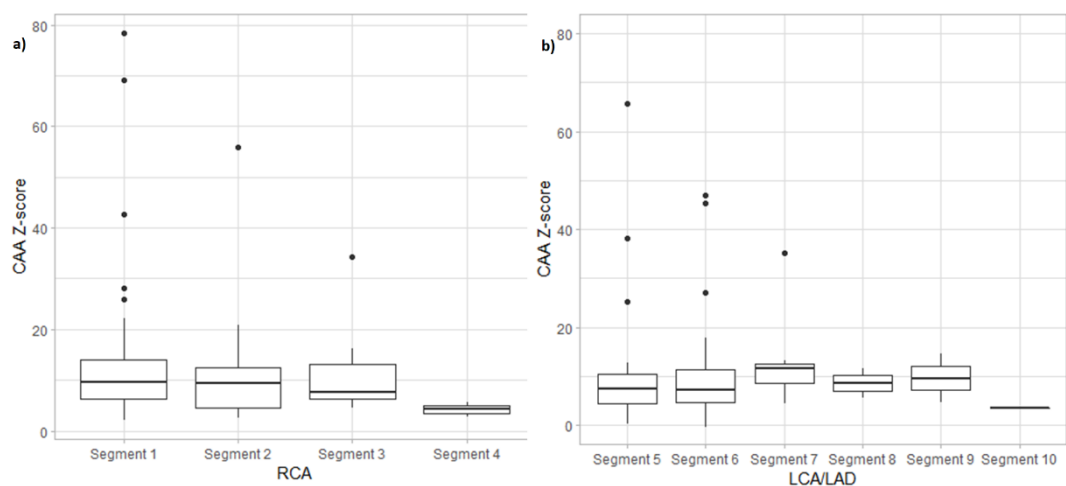

455

456 *Figure 3 Boxplots of CAA diameter per segment of the a) RCA: Median/IQR: Seg 1 10.07/6.90,*  
457 *Seg 2 9.10/7.60, Seg3 7.51/6.90, Seg 4 4.21/1.40, b) LCA/LAD: Median/IQR: Seg 5 7.31/5.97,*  
458 *Seg 6 7.18/6.40, Seg 7 11.49/3.94, Seg 8 8.55/3.06, Seg 9 9.61/4.99, Seg 10 3.46/0.00; CAA=*  
459 *Coronary Artery Aneurysm, RCA= Right coronary artery, LCA= Left coronary artery, LAD= Left*  
460 *anterior descending coronary artery; IQR= Interquartile range; Seg= Segment*

461
